# Supplementary material
Source: publisher site journal article supplement (https://www.dovepress.com/article/541923)
Supplement: Supplementary file 1 [file 541923%20Revised%20Supplementary%20Tables.docx]

**Table S1** Comparative Attributes, Strengths, and Weaknesses of Molecular Diagnostic Tools for Pulmonary Tuberculosis.3

| **Attribute** | **Xpert MTB/RIF** | **TB-LAMP** | **Line Probe Assay (LPA)** |
| --- | --- | --- | --- |
| Technology | Automated, nested real-time PCR in a self-contained cartridge | Manual, loop-mediated isothermal amplification (LAMP) | Manual, PCR amplification followed by reverse hybridization on nitrocellulose strips |
| Turnaround Time | < 2 hours | < 2 hours | 1-2 days |
| TB Detection | High sensitivity, including in smear-negative and extrapulmonary samples | Moderate-to-high sensitivity; superior to microscopy but less sensitive than Xpert MTB/RIF | High sensitivity in smear-positive samples; poor performance in smear-negative samples |
| Drug Resistance Detection | Rifampicin only | None | Rifampicin and isoniazid |
| Primary Role in Diagnostic Algorithm | Initial test for TB detection and rifampicin resistance screening in all populations | Alternative to smear microscopy for TB detection in resource-limited settings | Confirmatory test for MDR-TB diagnosis and isoniazid resistance detection |
| Ideal Setting | Decentralized testing at district and sub-district hospitals; point-of-care potential | Peripheral microscopy centers with minimal infrastructure | Centralized national or regional reference laboratories |
| Strengths | Rapid (<2 h), automated, high sensitivity, simultaneous rifampicin resistance detection, closed system minimizes contamination | Affordable equipment, simple workflow, suitable for peripheral labs, better sensitivity than microscopy, adaptable for batching | Detects both rifampicin and isoniazid resistance, high accuracy on appropriate samples, enables definitive MDR-TB diagnosis |
| Weaknesses | Detects both rifampicin and isoniazid resistance, high accuracy on appropriate samples, enables definitive MDR-TB diagnosis | Does not detect drug resistance, manual steps increase risk of error/contamination, lower sensitivity than Xpert | Technically demanding, requires advanced lab infrastructure and skilled staff, limited performance in smear-negative samples |

Abbreviation: MDR-TB is Multidrug resistance tuberculosis.

**Table S2** Search Strategies.

The summarized search term strategy for MEDLINE (via PubMed) (before 28/03/2025)

| **Domain(s)** | **Query** | **Search** | **Results** |
| --- | --- | --- | --- |
| Intervention (I) | #1 | ("molecular testing"[Title/Abstract] OR ("TB-LAMP"[Title/Abstract] OR "Loop-mediated isothermal amplification"[Title/Abstract]) OR ("line probe assay"[Title/Abstract] OR "LPA"[Title/Abstract]) OR "Xpert MTB/RIF"[Title/Abstract]) | 29,621 |
| Population (P) | #2 | "Tuberculosis"[Title/Abstract] OR "Tuberculosis"[MeSH Terms] | 289,190 |
| Study design (S) | #3 | "cost-utility analysis"[Title/Abstract] OR "cost benefit analysis"[Title/Abstract] OR "cost-effectiveness analysis"[Title/Abstract] OR "cost benefit analysis"[MeSH Terms] | 105,103 |
| I + P + S | #4 | #1 AND #2 AND #3 | 82 |

Note: The “#” symbol denotes the query number or step in the database search strategy.

The summarized search term strategy for SCOPUS (before 28/03/2025)

| **Domain(s)** | **Query** | **Search** | **Results** |
| --- | --- | --- | --- |
| Intervention (I) | #1 | TITLE-ABS("molecular testing") OR TITLE-ABS("TB-LAMP") OR TITLE-ABS("Loop-mediated isothermal amplification") OR TITLE-ABS("line probe assay") OR TITLE-ABS("LPA") OR TITLE-ABS("Xpert MTB/RIF") | 29,158 |
| Population (P) | #2 | TITLE-ABS("Tuberculosis") OR INDEXTERMS("Tuberculosis") | 381,788 |
| Study design (S) | #3 | TITLE-ABS("cost-utility analysis") OR TITLE-ABS("cost benefit analysis") OR TITLE-ABS("cost-effectiveness analysis") OR INDEXTERMS("cost benefit analysis") | 246,860 |
| I + P + S | #4 | #1 AND #2 AND #3 | 100 |

Note: The “#” symbol denotes the query number or step in the database search strategy.

The summarized search term strategy for EMBASE (before 28/03/2025)

| **Domain(s)** | **Query** | **Search** | **Results** |
| --- | --- | --- | --- |
| Intervention (I) | #1 | ('molecular testing':ti,ab,kw OR ('tb-lamp':ti,ab,kw OR 'loop-mediated isothermal amplification':ti,ab,kw) OR ('line probe assay':ti,ab,kw OR 'lpa':ti,ab,kw) OR 'xpert mtb/rif':ti,ab,kw) | 34,652 |
| Population (P) | #2 | ('tuberculosis':ti,ab,kw OR 'tuberculosis'/exp) | 380,277 |
| Study design (S) | #3 | ('cost-utility analysis':ti,ab,kw OR 'cost benefit analysis':ti,ab,kw OR 'cost-effectiveness analysis':ti,ab,kw OR 'cost benefit analysis'/exp) | 125,849 |
| I + P + S | #4 | #1 AND #2 AND #3 | 78 |

Note: The “#” symbol denotes the query number or step in the database search strategy.

**Table S3** CHEERS 2022 Criteria Assessment by Study.

| **Item** | **CHEERS 2022 Item** | **Kaso13**  **2021** | **Lee11**  **2019** | **Chitpim16**  **2022** | **Chitpim17**  **2025** | **Jo14**  **2021** | **Orlando10**  **2018** | **Pooran12**  **2019** | **Khumsri15**  **2020** |
| --- | --- | --- | --- | --- | --- | --- | --- | --- | --- |
| 1 | Title | / | / | / | / | / | / | / | / |
| 2 | Abstract | / | / | / | / | / | / | / | / |
| 3 | Background and Objectives | / | / | / | / | / | / | / | / |
| 4 | Health Economic Analysis Plan |  |  |  |  |  |  |  |  |
| 5 | Study Population | / | / | / | / | / | / | / | / |
| 6 | Setting and Location | / | / | / | / | / | / | / | / |
| 7 | Comparators | / | / | / | / | / | / | / | / |
| 8 | Perspective | / | / | / | / | / | / | / | / |
| 9 | Time Horizon | / | / | / | / | / | / | / | / |
| 10 | Discount Rate | / | / | / | / | / | / |  |  |
| 11 | Selection of Outcomes | / | / | / | / | / | / | / | / |
| 12 | Measurement of Outcomes | / | / | / | / | / | / | / | / |
| 13 | Valuation of Outcomes | / | / | / | / | / | / |  | / |
| 14 | Measurement and Valuation of Resources and Costs | / | / | / | / | / | / | / | / |
| 15 | Currency, Price Date, and Conversion | / | / | / | / | / | / | / | / |
| 16 | Rationale and Description of Model |  | / | / | / | / | / |  | / |
| 17 | Analytics and Assumptions | / | / | / | / | / | / | / | / |
| 18 | Characterizing Heterogeneity |  | / |  |  | / |  | / |  |
| 19 | Characterizing Uncertainty | / | / | / | / | / | / | / | / |
| 20 | Approach to Engagement with Stakeholders |  |  |  |  |  |  |  |  |
| 21 | Study Parameters | / | / | / | / | / | / | / | / |
| 22 | Summary of Main Results | / | / | / | / | / | / | / | / |
| 23 | Effect of Uncertainty | / | / | / | / | / | / | / | / |
| 24 | Effect of Stakeholder Engagement |  |  |  |  |  |  |  |  |
| 25 | Study Findings, Limitations, Generalizability, and Current Knowledge | / | / | / | / | / | / | / | / |
| 26 | Source of Funding | / | / | / | / | / | / | / | / |
| 27 | Conflicts of Interest | / | / | / | / | / | / | / |  |
| 28 | Availability of Data and Code | / | / |  |  |  |  |  |  |
|  |  | 23 | 25 | 23 | 23 | 24 | 23 | 21 | 21 |
|  |  | 82% | 89% | 82% | 82% | 86% | 82% | 75% | 75% |

Note: The “/” symbol serves as a checkmark indicating that a study met the specific CHEERS 2022 checklist item.
